# Supplementary material for: Aging aggravates hepatic ischemia-reperfusion injury in mice by impairing mitophagy with the involvement of the EIF2α-parkin pathway
Source: publisher site journal article supplement (doi:10.18632/aging.101511), 2018-08-08
Supplement: Supplementary file [file aging-v10i8-101511-supplementary-material-SD2.pdf]

SUPPLEMENTARY FIGURE

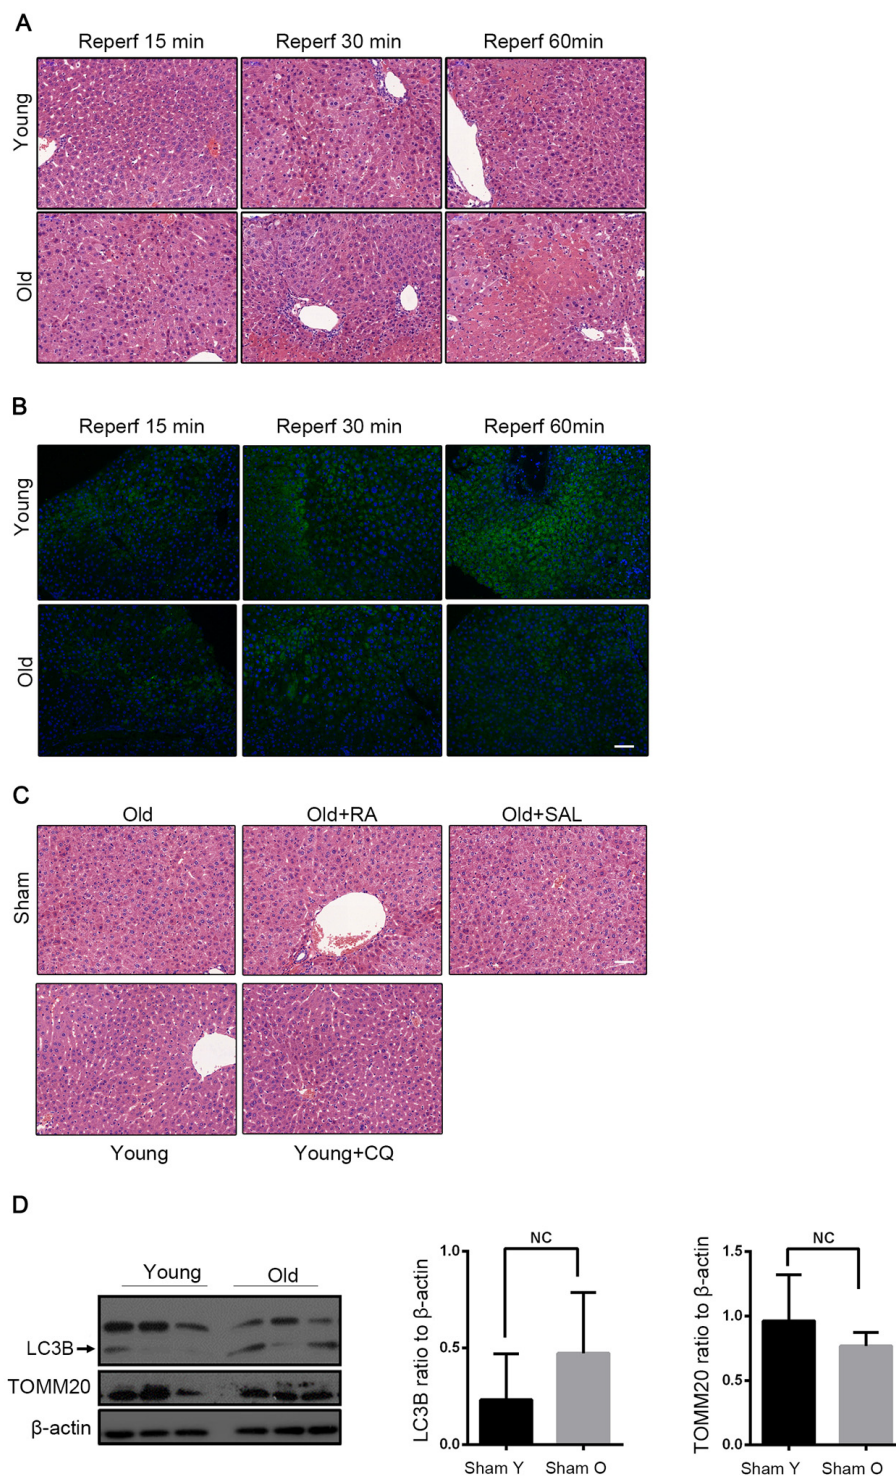

**Supplementary Figure 1. Mice of different age were treated as indicated. (A)** Representative histology of liver by H&E staining at 15, 30 and 60 minutes after reperfusion. **(B)** Representative images of LC3B staining of liver tissues by fluorescence microscopy at 15, 30 and 60 minutes after reperfusion. **(C)** Representative histology of liver by H&E staining from indicated sham group (Y for young mice, Y+CQ for young mice with chloroquine pretreatment, O for old mice, O+RA for old mice with Rapamycin pretreatment, O+SAL for old mice with Salubrinal pretreatment). **(D)** The LC3B and TOMM20 protein levels were determined by western blot analysis from sham group. Scale bar: 50 $\mu$ m.
